# Supplementary material
Source: publisher figshare collection journal article supplement (https://aacr.figshare.com/articles/dataset/_/23905310)

**Supplemental Figure 12:** Gene set enrichment analysis highlighting pathway associated with A. Gain 1q in all patients (all genes) B. Gain 1q in all patients (restricted to genes on chromosome 1) C. Gain 1q in t(4;14) patients D. Gain 1q in t(11;14) E. Focal versus whole arm 1q gain.

### A. 1q versus non 1q: all genes

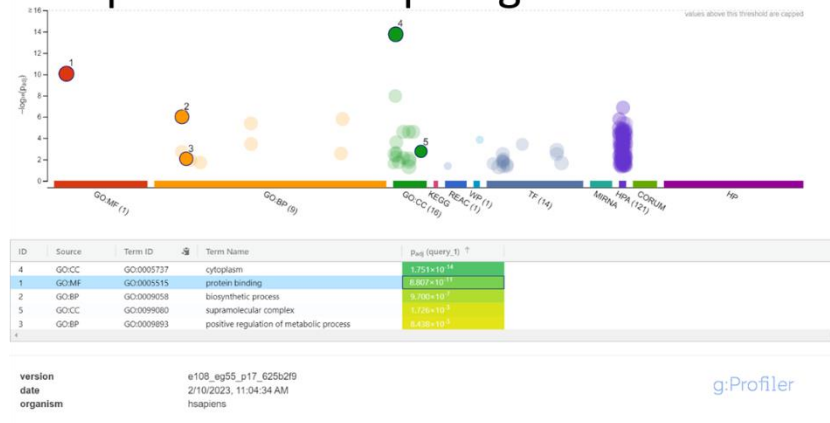

### B. 1q versus non 1q: 1q genes

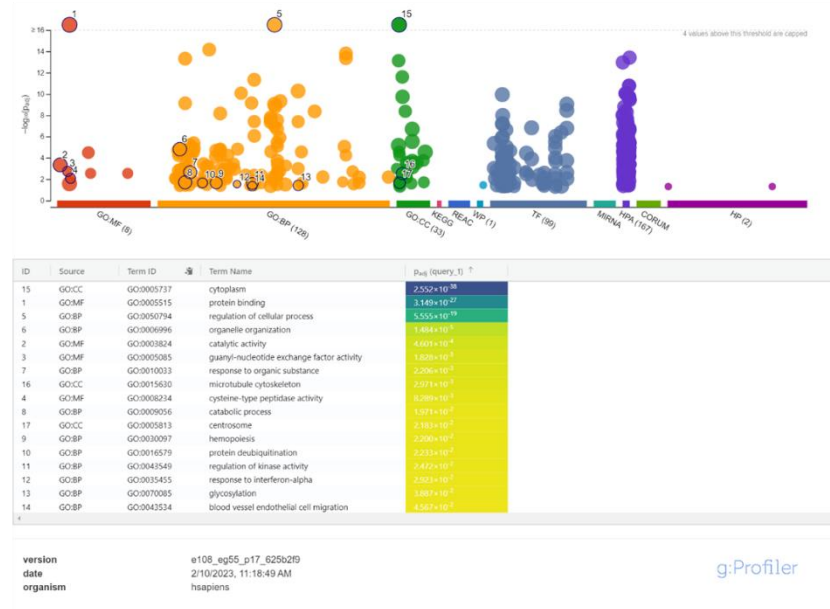

## C. t(4;14)

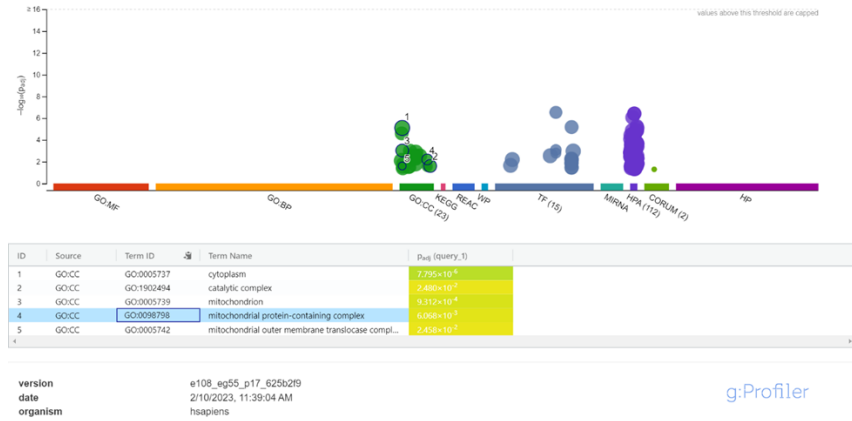

## D. t(11;14)

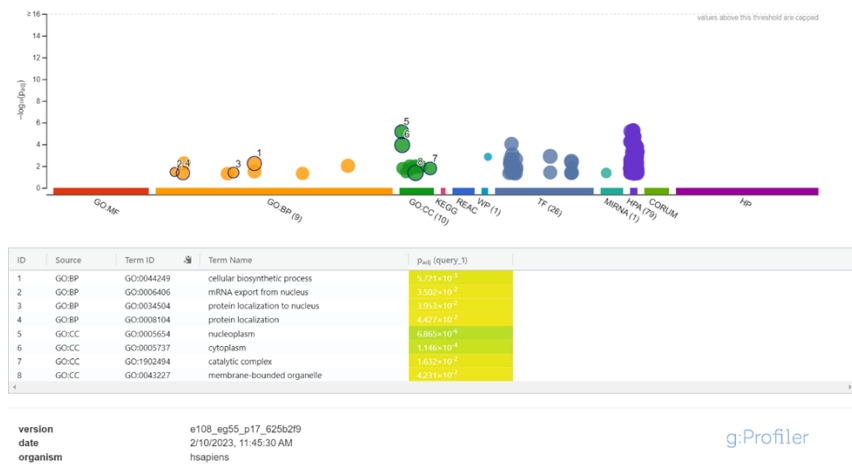

## E. Focal versus whole arm

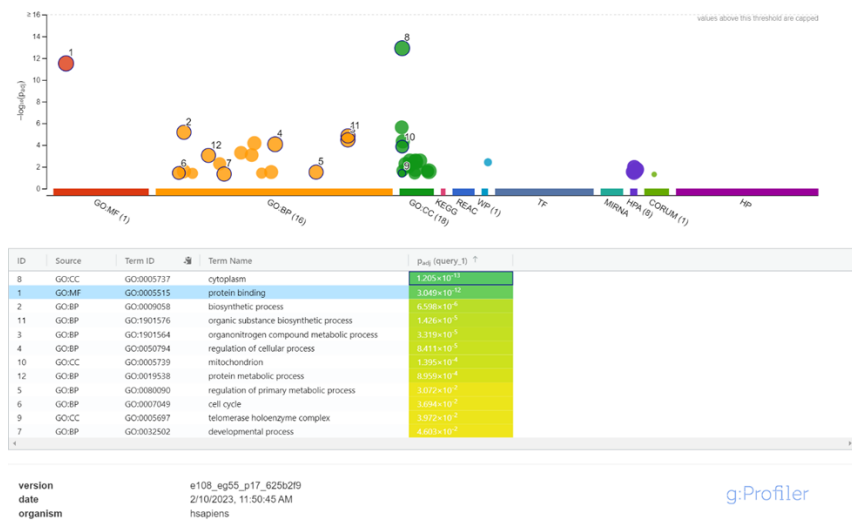

Supplement: Supplementary file 1 [file 41911496]
